# Ibudilast, a Pharmacologic Phosphodiesterase Inhibitor, Prevents Human Immunodeficiency Virus-1 Tat-Mediated Activation of Microglial Cells

Michelle Kiebal, Sanjay B. Maggirwar\*

Department of Microbiology and Immunology, University of Rochester School of Medicine and Dentistry, Rochester, New York, United States of America

## Abstract

Human Immunodeficiency Virus-1 (HIV-1)-associated neurocognitive disorders (HAND) occur, in part, due to the inflammatory response to viral proteins, such as the HIV-1 transactivator of transcription (Tat), in the central nervous system (CNS). Given the need for novel adjunctive therapies for HAND, we hypothesized that ibudilast would inhibit Tat-induced excess production of pro-inflammatory cytokines, such as tumor necrosis factor-alpha (TNF $\alpha$ ) in microglial cells. Ibudilast is a non-selective cyclic AMP phosphodiesterase inhibitor that has recently shown promise as a treatment for neuropathic pain via its ability to attenuate glial cell activation. Accordingly, here we demonstrate that pre-treatment of both human and mouse microglial cells with increasing doses of ibudilast inhibited Tat-induced synthesis of TNF $\alpha$  by microglial cells in a manner dependent on serine/threonine protein phosphatase activity. Ibudilast had no effect on Tat-induced p38 MAP kinase activation, and blockade of adenosine A<sub>2A</sub> receptor activation did not reverse ibudilast's inhibition of Tat-induced TNF $\alpha$  production. Interestingly, ibudilast reduced Tat-mediated transcription of TNF $\alpha$ , via modulation of nuclear factor-kappa B (NF- $\kappa$ B) signaling, as shown by transcriptional activity of NF- $\kappa$ B and analysis of inhibitor of kappa B alpha (I $\kappa$ B $\alpha$ ) stability. Together, our findings shed light on the mechanism of ibudilast's inhibition of Tat-induced TNF $\alpha$  production in microglial cells and may implicate ibudilast as a potential novel adjunctive therapy for the management of HAND.

**Citation:** Kiebal M, Maggirwar SB (2011) Ibudilast, a Pharmacologic Phosphodiesterase Inhibitor, Prevents Human Immunodeficiency Virus-1 Tat-Mediated Activation of Microglial Cells. PLoS ONE 6(4): e18633. doi:10.1371/journal.pone.0018633

**Editor:** Fatah Kashanchi, George Mason University, United States of America

**Received:** September 26, 2010; **Accepted:** March 14, 2011; **Published:** April 8, 2011

**Copyright:** © 2011 Kiebal, Maggirwar. This is an open-access article distributed under the terms of the Creative Commons Attribution License, which permits unrestricted use, distribution, and reproduction in any medium, provided the original author and source are credited.

**Funding:** This work was supported by the following National Institutes of Health grants: RO1 NS054578 and RO1 NS066801 (to SBM) and T32 AI49105 (to MK) (URL: <http://www.nih.gov/>). The funders had no role in study design, data collection and analysis, decision to publish, or preparation of the manuscript.

**Competing Interests:** The authors have declared that no competing interests exist.

\* E-mail: [sanjay\\_maggirwar@urmc.rochester.edu](mailto:sanjay_maggirwar@urmc.rochester.edu)

## Introduction

Human Immunodeficiency Virus-1 (HIV-1) enters the central nervous system (CNS) early after infection, and in many cases may result in a variety of neurological defects collectively termed HIV-1 associated neurocognitive disorders (HAND) [1]. HAND can include neurocognitive impairments, motor deficits, or dementias [2], and continues to significantly impair quality of life despite efficacious reduction of viral load by highly active anti-retroviral therapy (HAART) [3,4,5]. Traditionally, the onset of HAND correlated with CNS viral load, and the neuropathological features included multinucleated giant cells, reactive astrogliosis, myelin pallor, and neuronal loss [6,7,8,9]. Recent neuropathologic reports of severe white matter damage (i.e. leukoencephalopathy) in patients with HIV-1 infection and on HAART with very low viral load [10,11,12,13], suggest that additional patterns of primary brain disease are emerging, possibly due to as yet unexplained interactions between the virus, vulnerable populations of neural cells, and HAART [14,15].

The pathogenesis of HAND likely involves a toxic combination of secreted factors released from HIV-1 infected, brain-resident macrophage and glia, and oxidative stress, which together impair neuronal function. HIV-1 productively infects microglia and perivascular macrophage, the resident phagocytes of the CNS, but does not infect neurons. This suggests that HIV-1 indirectly

contributes to the neuropathology seen in HAND patients. Accordingly, neurologic deficits in HAND are more closely correlated with the presence of activated macrophage and microglia than with the amount of neuronal apoptosis or viral RNA [16,17,18]. Soluble viral proteins such as Tat and the glycoprotein gp120 can be released from infected microglia and macrophage [19]. Circulating Tat levels have been measured in patient sera from HIV-1 positive individuals, at levels ranging from 1–40 ng/mL [20,21], however, local extracellular concentrations in the CNS may be much higher, particularly in close proximity to HIV-1 positive perivascular cells [22]. Tat can also interact with and activate neighboring, uninfected cells including microglia, astrocytes, and neurons. Both infected and activated microglia and astrocytes produce pro-inflammatory cytokines including tumor necrosis factor-alpha (TNF $\alpha$ ) and interleukin-1 beta (IL-1 $\beta$ ), which further activate neighboring cells. Infected and activated cells also produce chemokines such as monocyte chemoattractant protein-1 (MCP-1), thereby attracting more inflammatory monocytes and macrophage [23,24]. Thus, circulating Tat is very likely involved in triggering this vicious inflammatory cycle, eventually leading to neuron damage and cognitive deficits [20].

It is clear that despite effective control of systemic HIV-1 levels with HAART, cognitive impairment still persists with a high prevalence. Considering the failure of antiretroviral therapies to prevent or reverse cognitive decline mediated by HIV-1, recent

focus has shifted to the development of adjunctive therapies that specifically target neurocognitive impairment. General classes of drugs being explored in clinical trials include anti-inflammatory agents such as minocycline (NCT00361257 - <http://www.clinicaltrials.gov> identifier), antioxidants such as selegiline [25,26], and anti-excitotoxic drugs such as memantine [27]. Only memantine, which is an N-methyl-D-aspartic acid receptor (NMDAR) blocker, has shown potential neuroprotective properties as determined by magnetic resonance spectroscopy [27]. Given the need for novel adjunctive therapies for HAND, we hypothesized that the phosphodiesterase inhibitor, ibudilast, would inhibit Tat-induced, excess production of pro-inflammatory cytokines, such as TNF $\alpha$ , in microglial cells.

Ibudilast is a relatively non-selective cyclic AMP phosphodiesterase (PDE) inhibitor that has been used for decades in Japan to treat bronchial asthma and post-stroke dizziness [28,29]. Ibudilast has also recently shown promise as a treatment for neuropathic pain, in multiple rat models, via its ability to attenuate glial cell activation [30]. Interestingly, *in vitro* experiments have shown that ibudilast has potential as an anti-inflammatory agent, as it can inhibit lipopolysaccharide (LPS)-induced cytokine production in microglial cells [31,32]. Ibudilast is also currently being tested in clinical trials as a treatment for multiple sclerosis (MS), opioid withdrawal, and neuropathic pain, all of which are conditions involving aberrant microglial activation and CNS inflammation [28,33,34]. Other PDE inhibitors, pentoxifylline and rolipram, have been investigated as anti-inflammatory agents, and have been shown to inhibit HIV-1 replication [35,36,37]. Because of its approval for use in humans, as well as its ability to cross the blood brain barrier and inhibit glial cell activation, ibudilast is an exciting potential adjunctive therapy for HAND [30]. Here we investigate the anti-inflammatory properties of ibudilast in the context of HIV-1-induced neuroinflammation.

Initial experiments in human microglial cells demonstrated that ibudilast did indeed inhibit Tat-induced pro-inflammatory cytokine production in these cells. Similarly, in BV-2 mouse microglial cells, ibudilast had an inhibitory effect on Tat-induced TNF $\alpha$  production. These results are in agreement with previous reports of ibudilast's ability to attenuate glial cell activation. Further *in vitro* experiments were performed to determine the mechanisms of ibudilast's inhibition of TNF $\alpha$  release from microglial cells. These experiments suggested that ibudilast inhibits Tat-mediated transcription of TNF $\alpha$  via modulation of nuclear factor-kappa B (NF- $\kappa$ B) signaling. Together, our findings shed light on the mechanism of ibudilast's inhibition of Tat-induced TNF $\alpha$  production in microglial cells and may implicate ibudilast as a potential novel adjunctive therapy for the management of HAND.

## Methods

### Reagents

HIV-1 Tat 1–72 was obtained from Philip Ray (University of Kentucky, Lexington, KY, USA). This recombinant Tat protein was used at 100 nM (~800 ng/mL) concentration, unless otherwise noted. Soluble Tat levels in HIV-1 patient sera have been measured up to 40 ng/mL [20,21]. It has also been shown that Tat can interact with endogenous glycosaminoglycans and heparan sulfates, thereby potentially lowering its measurable concentration *in vivo* [38]. Therefore, it is likely that Tat concentrations surrounding HIV-1-infected cells are much higher [22]. In addition, Tat's exceedingly strong affinity for other proteins and glass/plastic, and its temperature susceptibility, make it impossible to determine exactly what fraction of the Tat "starting dose" actually reaches the experimental specimen, thus

likely leading to an underestimation of Tat functions *in vitro* [39]. Finally, Tat's effects *in vivo* are likely to occur over long-term chronic exposures. Chronic, low dose *in vivo* effects of any reagent are often appropriately modeled *in vitro*, by proportionately higher doses of that same reagent, over more acute time frames. For these reasons, and in order to be consistent with previous experiments from our laboratories, and others, we use 100 nM Tat for these experiments, which is at the lower end of the Tat dose range seen with many comparable studies, and which many studies have found to be an appropriate Tat dose by which to model Tat's *in vivo* effects *in vitro*.

Ibudilast was obtained from Santa Cruz Biotechnologies Inc., (Santa Cruz, CA, USA). Okadaic acid (Oka) was purchased from Calbiochem/Millipore (Billerica, MA, USA). SB203580 and 3-[4,5-Dimethylthiazol-2-yl]-2,5-diphenyltetrazolium bromide (MTT) were purchased from Sigma-Aldrich (St. Louis, MO, USA). ZM241385 and CGS21680 were purchased from Tocris Bioscience, (Ellisville, MO, USA). MG-132 was purchased from BioMol International/Enzo Life Sciences (Plymouth Meeting, PA, USA). DMSO was used as a vehicle control. Anti-Tat antibody was obtained from the AIDS Research and Reference Reagent Program (Germantown, MD, USA) and non-immune control serum (IgG) was obtained from Santa Cruz Biotechnologies Inc., (Santa Cruz, CA, USA). Both antibodies were used at a concentration of 8  $\mu$ g/mL.

### Cell Cultures

Human microglial cells that were isolated from fetal human brain were obtained from Clonexpress (Gaithersburg, MD, USA) and were maintained in 50:50 DMEM: F-12 supplemented with 5% FBS and 10 ng/mL of M-CSF.

The murine microglial cell-line (BV-2) was obtained from Dr. R. Donato (University of Perugia, Perugia, Italy). These cells were maintained in DMEM containing 10% FBS, 2 mM glutamine, and antibiotics, by standard procedures.

### ELISA

TNF $\alpha$  levels were measured in culture supernatants (pre-cleared by brief centrifugation) by using a mouse TNF $\alpha$  ELISA kit (eBioscience, San Diego, CA, USA) according to the manufacturer's instructions. This kit has a minimum sensitivity threshold of 8 pg/mL. Briefly, 50  $\mu$ L of cell culture supernatant was incubated in a 96-well plate pre-coated with a TNF $\alpha$ -specific monoclonal antibody for 1.5 h. After extensive washing, binding of TNF $\alpha$  was detected by incubation with biotinylated antibodies, followed by streptavidin-peroxidase; colorimetric enzyme assays were performed to detect bound TNF $\alpha$ .

Other cytokine levels were measured using Bio-Plex Multi-Plex analysis for detecting a panel of multiple cytokines from a single sample (Bio-Rad, Hercules, CA, USA). Briefly, this technology uses multiple spectrally identifiable polystyrene beads, each coated with a different anti-cytokine antibody, followed by target, then secondary antibody binding, to detect multiple cytokines from a single sample in typical sandwich-assay fashion. This assay was utilized to measure levels of TNF $\alpha$ , IL-1 $\beta$ , IL-6, and MCP-1 in Tat-treated, primary human microglia supernatant samples, as previously described [40,41].

### MTT Assay

BV-2 cells ( $1.2 \times 10^5$ ) were plated in a 24-well plate and were treated with increasing concentrations of ibudilast or DMSO control for 7 h.  $10 \times$  MTT was added to the wells and the cells were incubated for an additional 1 h at 37°C. After removal of the media, MTT solvent (4 mM HCl, 0.1% NP40, in isopropanol) was added to dissolve the formazan dye. The optical density was

measured at 570 nm and the percent cell survival was determined compared to the untreated (NT) sample.

### p38 MAP Kinase Activity Assay

p38 MAP kinase activity levels were measured in BV-2 cell lysates using a p38 kinase activity kit (Cell Signaling Technology, Danvers, MA, USA) according to the manufacturer's instructions. Briefly, phosphorylated p38 was immunoprecipitated from 200  $\mu$ L of whole cell lysate using a phospho-p38 MAP kinase monoclonal antibody crosslinked to agarose hydrazide beads. The antibody-bead pellet was then incubated with an Activating Transcription Factor-2 (ATF-2) fusion protein as the substrate. ATF-2 phosphorylation was detected by immunoblot analysis using a phospho-ATF-2 (Thr71) antibody. Equal protein content among the samples was verified using immunoblot analysis for total p38 and  $\alpha$ -Tubulin levels in the cell lysate supernatant that was collected after the immunoprecipitation.

### Plasmids

The luciferase reporter construct driven by NF- $\kappa$ B and the RelA expression plasmid were obtained from Dr. S. C. Sun (MD Anderson Cancer Center, University of Texas, Houston, TX, USA). The luciferase reporter construct driven by the mouse TNF $\alpha$  (mTNF $\alpha$ ) promoter was obtained from Dr. Dmitry Kuprash (Engelhardt Institute of Molecular Biology, Moscow, Russia).

### Transient Transfections

BV-2 cells were transfected with plasmid DNA using Nucleofector (Amaxa/Lonza, Basel, Switzerland; Walkersville, MD, USA). For nucleofection,  $10 \times 10^6$  cells were transfected with 10  $\mu$ g total plasmid DNA. Transfected cells were plated at  $3.5 \times 10^5$  cells/well in a 24-well plate and incubated for 24 h prior to treatment. Media was changed 4 h after transfection and again prior to treatment to reduce cell toxicity. In order to determine transfection efficiency, a separate aliquot of BV-2 cells was transfected with a p-Max-GFP expressing vector (Amaxa/Lonza, Basel, Switzerland; Walkersville, MD, USA), and 24 h post-transfection, greater than 90% of BV-2 cells were GFP-positive.

### Luciferase Assays

Luciferase reporter plasmids containing either NF- $\kappa$ B responsive elements upstream of a firefly luciferase gene or the mouse TNF $\alpha$  promoter region upstream of a firefly luciferase gene were transfected into BV-2 cells using Nucleofector (Amaxa/Lonza, Basel, Switzerland; Walkersville, MD, USA). 24 h post-transfection, cells were either left untreated or were incubated for 8 h with 100 nM Tat. Cell lysates were prepared using 1 $\times$  reporter lysis buffer (Promega Life Sciences, Madison, WI, USA), and luciferase activity was measured with a SpectraMax M3 Plate Reader (Molecular Devices, Sunnyvale, CA). In these assays, total protein amount as determined by Bradford assay (Bio-Rad, Hercules, CA, USA), was used to normalize the samples. In the case of luciferase assays without Tat treatment, co-transfection with a *Renilla* luciferase reporter driven by the constitutively active herpes simplex virus type 1 thymidine kinase (HSV-1 TK) promoter was used as an internal control for transfection efficiency. In the case of luciferase assays with Tat treatment, parallel transfection with a luciferase reporter plasmid containing responsive elements of the OCT-1 transcription factor upstream of a firefly luciferase gene was used as a control for the specificity of Tat's effect on transcription.

### Protein Phosphatase Activity Assay

BV-2 cells ( $4.6 \times 10^5$ ) were plated in 6-well plates and were treated with 50  $\mu$ M ibutilast for the indicated periods of time. Cells were washed in phosphate buffered saline (PBS) and whole cell lysates were collected in ELB buffer (50 mM HEPES (pH 7), 250 mM NaCl, 0.1% Nonidet P-40, 5 mM EDTA, 10 mM NaF, 0.1 mM Na<sub>3</sub>VO<sub>4</sub>, 50  $\mu$ M ZnCl<sub>2</sub>, supplemented with 0.1 mM PMSF, 1 mM DTT, and a mixture of protease inhibitors, phosphatase inhibitors were not added). PP2A activity was measured with a Ser/Thr phosphatase assay kit (Promega Life Sciences, Madison, WI, USA) according to the manufacturer's protocol. Briefly, samples containing 5  $\mu$ g of cell protein were added to a solution containing the peptide substrate (100  $\mu$ M) in a 96-well plate and incubated for 10 min. Then a Malachite Green solution was added (50  $\mu$ L) and absorbance (560 nm) was measured on a DTX 880 Microplate Reader (Beckman Coulter, Brea, CA). Phosphate release was determined by comparing absorbance with a standard curve.

### Immunoblotting Assays

Following the indicated treatments, whole cell lysates were prepared in ELB buffer (50 mM HEPES (pH 7), 250 mM NaCl, 0.1% Nonidet P-40, 5 mM EDTA, 10 mM NaF, 0.1 mM Na<sub>3</sub>VO<sub>4</sub>, 50  $\mu$ M ZnCl<sub>2</sub>, supplemented with 0.1 mM PMSF, 1 mM DTT, and a mixture of protease and phosphatase inhibitors). Cellular debris was removed by high-speed centrifugation. Lysates were fractionated on 7.5% SDS-PAGE gels and protein was electrophoretically transferred to Hybond ECL nitrocellulose membrane (GE Healthcare Bio-Sciences Corporation, Piscataway, NJ, USA). The membranes were analyzed for immunoreactivity with primary antibodies raised against I $\kappa$ B $\alpha$  (1:1000), RelA (1:1000), or  $\alpha$ -Tubulin (1:1000; all from Santa Cruz Biotechnologies Inc., Santa Cruz, CA, USA), p38 MAP kinase (1:1000), Phospho-p38 MAPK (1:1000), RelA P-S276 (1:1000), RelA P-S536 (1:1000), or PP2Ac (1:1000; all from Cell Signaling Technology, Danvers, MA, USA). Bound antibodies were detected by species-specific, horseradish peroxidase (HRP)-conjugated secondary antibodies (1:3000, GE Healthcare Bio-Sciences Corporation, Piscataway, NJ, USA), followed by addition of ECL reagent (Pierce Biotechnology/Thermo Fisher Scientific, Rockford, IL, USA) and subsequent exposure to x-ray film. Equal loading and uniformity of protein transfer to the nitrocellulose membrane were verified by stripping and reprobing the membranes with primary antibodies specific to  $\alpha$ -Tubulin.

### Real-Time RT-PCR Analyses

Total RNA was isolated from treated BV-2 cells ( $2.5 \times 10^5$ ) using the Roche High Pure RNA Isolation kit (Roche Applied Science, Indianapolis, IN, USA) according to the manufacturer's protocol. Complementary DNA (cDNA) synthesis was performed using 2  $\mu$ g total RNA, oligo-dT primers, and the Superscript III first-strand synthesis system (Invitrogen, Carlsbad, CA, USA). Gene-specific primer sequences were as follows: 1) TNF $\alpha$  primers: forward 5'-ACTCCAGAACATCTTGGAAATAGC-3', reverse 5'-GCGG-ATCATGCTTTTCTGTGC-3'; 2) GAPDH primers: forward 5'-TGATGACATCAAGAAGGTGGTGAA-3', reverse 5'-TCCT-TGGAGGCCATGTAGGCCAT-3'. Real-time RT-PCR was performed using iQ<sup>TM</sup> SYBR<sup>®</sup> Green PCR Supermix (Bio-Rad, Hercules, CA, USA) and 100 nM gene-specific forward and reverse primers in 20  $\mu$ L total volume. After denaturation for 3 min. at 95°C, the PCR was run for 40 cycles of 95°C for 30 sec., primer-specific melting ( $T_m$  °C) for 1 min., and 72°C for 30 sec. using an iCycler instrument (Bio-Rad, Hercules, CA, USA). GAPDH served as an internal control in these experiments.

## Statistical Analysis

Mean data values and the standard error of the mean (SEM) were calculated for each variable. One-way ANOVA followed by Bonferroni's test for multiple comparisons was used to analyze data involving the analysis of multiple sample groups. A value of  $p < 0.05$  was designated as statistically significant.

## Results

### Ibutilast inhibits Tat-induced pro-inflammatory cytokine production in microglial cells

Multiple reports have shown that ibutilast can inhibit both LPS and interferon-gamma (IFN- $\gamma$ )-induced production of pro-inflammatory molecules in microglial cells, thus highlighting the anti-inflammatory activities of this drug [32,42]. This led us to hypothesize that ibutilast may inhibit Tat's effects on microglial cells. Although exposure of microglial cells to LPS, IFN- $\gamma$ , and Tat can all similarly result in cytokine synthesis and NF- $\kappa$ B activation, the upstream signaling events leading to this cytokine production are vastly different among these varying stimuli. For example, LPS is recognized by Toll-like receptor 4 (TLR4), leading to NF- $\kappa$ B activation, whereas IFN- $\gamma$  activates the IFN- $\gamma$  receptor (IFN- $\gamma$ R), leading to activation of the Janus kinase (JAK)/signal transducers and activators of transcription (STAT) pathway. Alternatively, exposure of microglial cells to Tat does not result in TLR or IFN- $\gamma$ R activation. Extracellular Tat can enter cells in an active form [38,43], leading to the activation of multiple signaling pathways including NF- $\kappa$ B and MAP kinase cascades. Activated microglia are believed to be centrally involved in HAND-associated neuropathology as pro-inflammatory factors, such as TNF $\alpha$ , released from infected and activated macrophage and glial cells play a central role in the inflammatory cycle that eventually leads to neuron damage and cognitive deficits [44,45]. We first used a multi-plex cytokine array assay to determine whether ibutilast altered Tat-induced pro-inflammatory cytokine and chemokine production in human microglial cells. These results (Figure 1A) indicated a profound reduction in Tat-induced production of TNF $\alpha$  and IL-1 $\beta$  by ibutilast. Although not significant, there was also a trend toward dose-dependent inhibition of Tat-mediated IL-6 and MCP-1 production by ibutilast. Our results for MCP-1 are in agreement with previous reports that human monocytes and monocyte-derived macrophage have high basal levels of MCP-1 production in the absence of pro-inflammatory stimuli [46,47]. Based on previously published results, MCP-1 production is induced after 12–24 h incubation with Tat [48,49]. Therefore, it is likely that with a longer treatment time with Tat, we would have seen a more robust increase in MCP-1 production. In addition, little is known about the temporal relationship between TNF $\alpha$ , IL-1 $\beta$ , IL-6, and MCP-1 production caused by Tat in microglial cells *in vivo*. These results in human microglial cells strongly support an anti-inflammatory role of ibutilast.

We next focused on ibutilast's ability to inhibit Tat-induced TNF $\alpha$  synthesis in the mouse microglial BV-2 cell line, which is genetically manipulatable. These cells are also widely used for studies related to inflammation induced by generic inflammatory mediators [50,51,52], and those encoded by HIV-1 [53,54]. Following an 8 h 100 nM Tat treatment of these cells, we collected culture supernatants and measured TNF $\alpha$  levels by ELISA. The results shown in Figure 1B reveal the ability of ibutilast to inhibit Tat-mediated TNF $\alpha$  production in mouse microglial BV-2 cells, further supporting an anti-inflammatory role for ibutilast in the context of HIV-1. As shown in Figure 1, there is slightly less inhibition of TNF $\alpha$  by ibutilast in BV-2 cells than in human microglial cells. This could be due to the fact that BV-2

cells are rapidly dividing, whereas the human microglial cells are non-dividing. We also confirmed that ibutilast's inhibition of TNF $\alpha$  production was not due to cellular toxicity. The MTT assay was used as a measure of cell viability. As shown in Figure 1C, treatment of BV-2 cells with increasing concentrations of ibutilast did not result in significant cell death.

### Blockade of adenosine A<sub>2A</sub> receptor does not reverse ibutilast's inhibition of Tat-mediated TNF $\alpha$ production

Next we examined the mechanisms by which ibutilast inhibits Tat-induced TNF $\alpha$  production. PDE inhibition is known to affect adenosine receptor activation [55,56,57], and adenosine is an important director of inflammatory responses [58,59,60]. Adenosine receptor activation can inhibit the production of TNF $\alpha$ , and in the context of HIV-1, it has been shown that adenosine A<sub>2A</sub> receptor activation inhibits Tat-induced TNF $\alpha$  production in human monocytes [61]. Therefore, we speculated that ibutilast's inhibition of Tat-induced TNF $\alpha$  production might involve modulation of adenosine A<sub>2A</sub> receptor activation. As shown in Figure 2A, we confirmed that activation of the A<sub>2A</sub> receptor with the agonist CGS21680 (1  $\mu$ M) inhibited Tat-induced TNF $\alpha$  production in mouse microglial cells as measured by TNF $\alpha$  ELISA. This inhibition was reversed with the A<sub>2A</sub> receptor antagonist ZM241385 (100 nM). Pre-treatment with an anti-Tat antibody also blocked Tat-induced TNF $\alpha$  production, whereas a control non-immune IgG had no effect on Tat-induced TNF $\alpha$ . This indicated that the TNF $\alpha$  production was Tat-specific (Figure 2A). However, blockade of A<sub>2A</sub> receptor activation with increasing concentrations of ZM241385 did not reverse the inhibition of Tat-induced TNF $\alpha$  release by ibutilast in mouse microglial cells (Figure 2B), suggesting that ibutilast's inhibition of TNF $\alpha$  does not involve adenosine A<sub>2A</sub> receptor activation.

### Tat-induced activation of p38 MAP kinase is not affected by ibutilast

To further examine the mechanisms of ibutilast's inhibition of Tat-mediated TNF $\alpha$  production, we looked at the activation of p38 MAP kinase, which is known to play an important role in the production of pro-inflammatory cytokines [62]. p38 MAP kinase is also a known target for other PDE inhibitors such as pentoxifylline [63]. Using an antibody that recognizes phosphorylated p38, we did see an increase in the phosphorylation of p38 induced by 15 min. 100 nM Tat treatment (Figure 3A). Pre-treatment with increasing concentrations of ibutilast did not affect Tat-induced p38 phosphorylation. Under these conditions total p38 levels (protein loading control) were not altered. In addition, there was an approximately 15-fold increase in p38 MAP kinase activity induced by 20 min. 100 nM Tat treatment, as measured by an *in vitro* kinase assay (Figure 3B). Pre-treatment with ibutilast did not inhibit this Tat-induced increase in p38 activity. As a positive control, the p38 inhibitor, SB203580, did reduce Tat-mediated p38 kinase activity. Densitometric analysis of the phospho-ATF-2 bands versus the total p38 bands is shown in Figure 3B.

### Ibutilast inhibits Tat-induced TNF $\alpha$ production through serine/threonine protein phosphatase activity

PDE inhibitors have been shown to modulate protein phosphatase activity [64,65], and the involvement of protein phosphatases in the inhibition of Tat-induced TNF $\alpha$  production has been well characterized [61]. Thus, we predicted that the inhibitory actions of ibutilast on TNF $\alpha$  production could be regulated by protein phosphatase activation. As expected, ibutilast's inhibition of Tat-induced TNF $\alpha$  production was

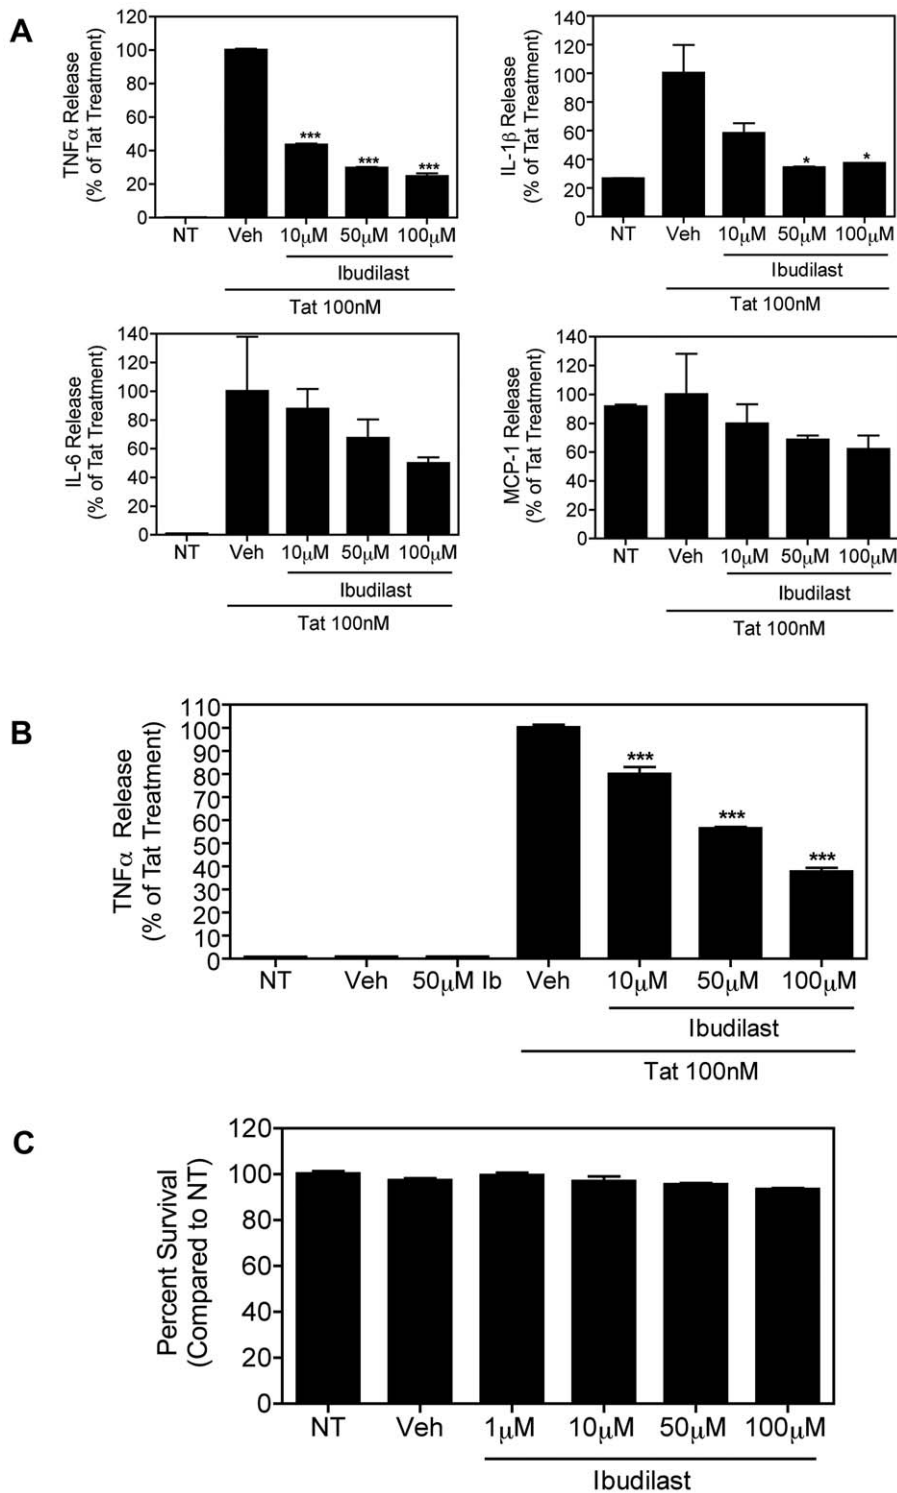

**Figure 1. Ibutilast dose-dependently inhibits Tat-induced pro-inflammatory cytokine production in microglial cells.** A, Human microglial cells ( $1 \times 10^5$ ) were left untreated (NT) or were treated with Tat (100 nM) for 8 h with or without pre-treatment for 30 min. with increasing concentrations of ibutilast or vehicle (Veh), as indicated. TNF $\alpha$ , IL-1 $\beta$ , IL-6, and MCP-1 levels in culture supernatants were analyzed by Multi-Plex cytokine array, as described in Methods. The Tat+Veh-treated samples were set to 100% and all other samples were compared to this value. Results are shown as mean  $\pm$  SD of values derived from two replicates from a single representative experiment. Statistical significance (\*\*\*,  $p < 0.001$ ; \*,  $p < 0.05$ ) is indicated, as compared to Tat+Veh-treated cells. The average cytokine/chemokine concentration of the Tat+Veh-treated sample was as follows; TNF $\alpha$ : 8166 pg/mL, IL-1 $\beta$ : 3.3 pg/mL, IL-6: 6027 pg/mL, and MCP-1: 1480 pg/mL. B, Similarly, murine microglial cells (BV-2;  $1.2 \times 10^5$ ) were left untreated (NT) or were treated with Tat (100 nM) for 8 h with or without pre-treatment for 30 min. with increasing concentrations of ibutilast or vehicle (Veh), as indicated. TNF $\alpha$  release was measured by ELISA. Results are shown as mean  $\pm$  SEM of values derived from three replicates from a single representative experiment; three total experiments were performed. Statistical significance ( $p < 0.001$ ) is indicated, as compared to Tat+Veh-treated cells (\*\*\*)). The TNF $\alpha$  concentration of the Tat+Veh-treated sample was 1861 pg/mL. C, BV-2 cells ( $1.2 \times 10^5$ ) were left untreated (NT) or were

treated with increasing concentrations of ibutilast or vehicle (Veh), as indicated, for 8 h. The MTT assay was used as a measure of cell viability. Percent survival was calculated as compared to the untreated sample. Results are shown as mean  $\pm$  SEM of values derived from four replicates from a single representative experiment; two total experiments were performed.  
doi:10.1371/journal.pone.0018633.g001

significantly reversed by okadaic acid (50 nM), which is a serine/threonine protein phosphatase inhibitor (Figure 4A). This indicated that the anti-TNF $\alpha$  effects of ibutilast were protein phosphatase dependent. Additionally, we measured phosphatase activity in whole cell extracts from ibutilast-treated BV-2 cells. Ibutilast significantly increased serine/threonine phosphatase activity after 60 min. (Figure 4B). Besides increasing phosphatase activity, ibutilast treatment also increased levels of the catalytically

active PP2Ac subunit as detected by immunoblot analysis (Figure 4C). Together these results indicate that ibutilast treatment leads to higher PP2A activity.

#### Ibutilast's reduction of Tat-mediated TNF $\alpha$ is at the transcriptional level

Considering that protein phosphatase activation can affect multiple signaling pathways [66,67,68], we predicted that ibutilast

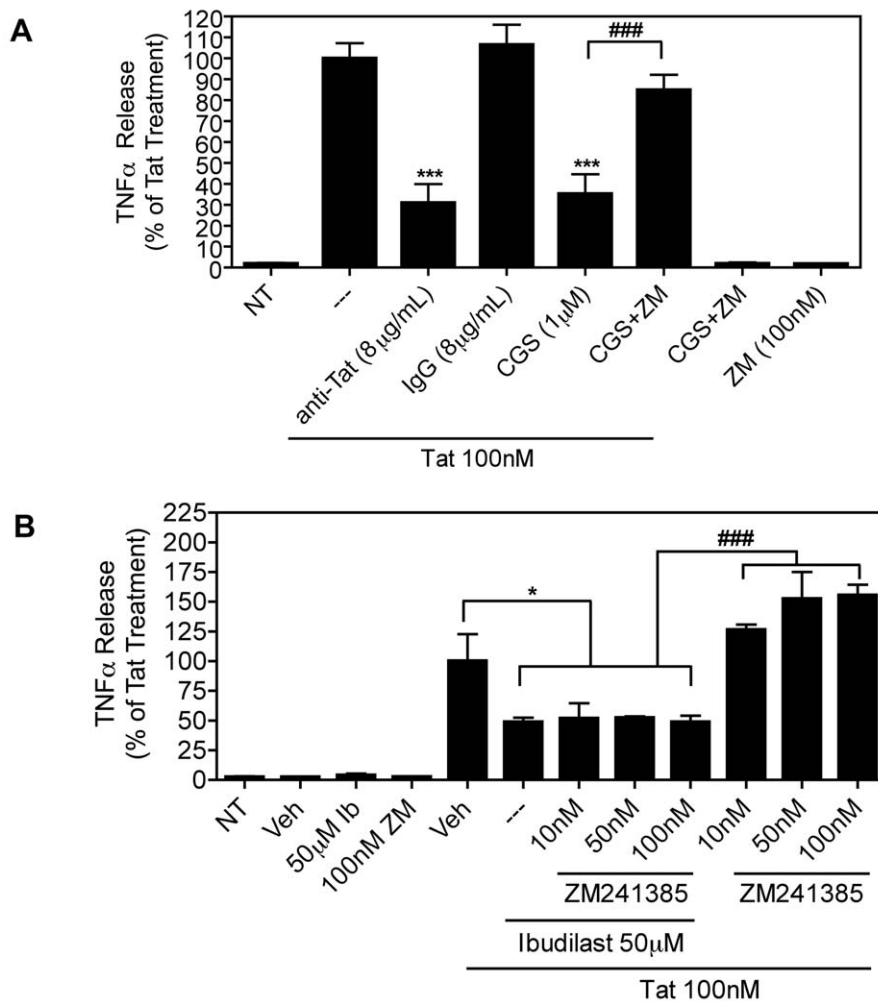

**Figure 2. Inhibition of Tat-induced TNF $\alpha$  production by ibutilast is not reversed by blockade of adenosine A<sub>2A</sub> receptor.** A, BV-2 cells ( $1.5 \times 10^5$ ) were left untreated (NT) or were treated with Tat (100 nM) for 8 h with or without pre-treatment for 30 min. with either anti-Tat or control IgG antibodies (8  $\mu$ g/mL) or adenosine A<sub>2A</sub> receptor agonist, CGS21680 (CGS, 1  $\mu$ M) or antagonist, ZM241385 (ZM, 100 nM), as indicated. TNF $\alpha$  release was measured by ELISA. The Tat-treated samples were set to 100% and all other samples were compared to this value (the TNF $\alpha$  concentration for this sample was 3475 pg/ $\mu$ g total protein content). Results are shown as mean  $\pm$  SEM of values derived from four replicates from a single representative experiment; two total experiments were performed. Statistical significance ( $p < 0.001$ ) is indicated, as compared to Tat-treated cells (\*\*\*) or as compared to Tat+CGS-treated cells (###). B, BV-2 cells ( $1.2 \times 10^5$ ) were left untreated (NT) or were treated with Tat (100 nM) for 8 h with or without pre-treatment for 30 min. with ibutilast (Ib, 50  $\mu$ M) or vehicle (Veh) alone or together with increasing concentrations of the adenosine A<sub>2A</sub> receptor antagonist, ZM241385, as indicated. TNF $\alpha$  release was measured by ELISA. The Tat+Veh-treated samples were set to 100% and all other samples were compared to this value (the TNF $\alpha$  concentration for this sample was 696.2 pg/mL). Results are shown as mean  $\pm$  SEM of values derived from three replicates from a single representative experiment; two total experiments were performed. Statistical significance is indicated, as compared to Tat+Veh-treated cells ( $p < 0.05$ , \*) or as compared to Tat+ZM241385-treated cells ( $p < 0.001$ , ###).  
doi:10.1371/journal.pone.0018633.g002

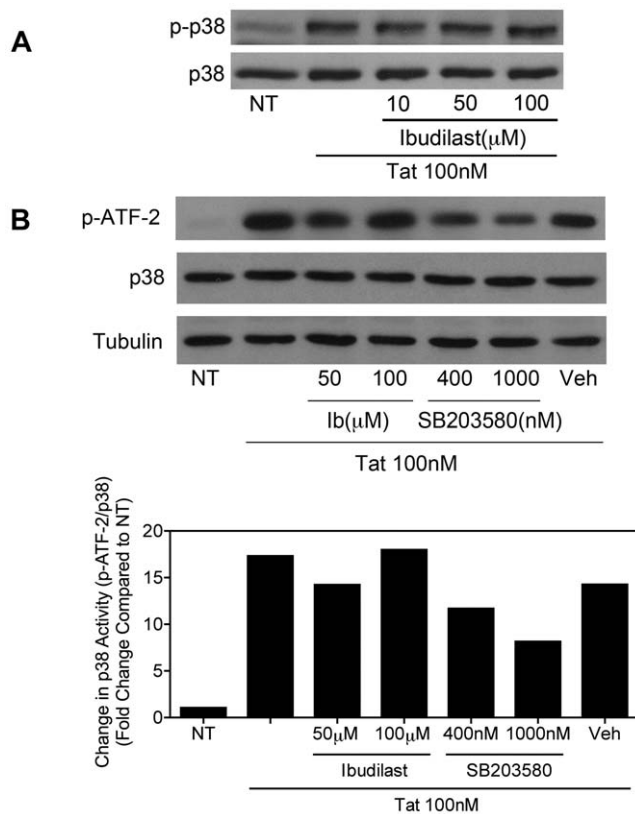

**Figure 3. Ibudilast does not inhibit Tat-induced activation of p38 MAP kinase.** A, BV-2 cells ( $1.2 \times 10^5$ ) were left untreated (NT) or were treated with Tat (100 nM) for 15 min. with or without pre-treatment for 5 min. with increasing concentrations of ibudilast, as indicated. Whole cell lysates were subjected to immunoblot analysis using either phospho-p38 MAPK-specific (*upper panel*) or p38 MAPK-specific (*lower panel*) antibodies. The results of a single representative experiment are shown; three total experiments were performed. B, BV-2 cells ( $2.4 \times 10^5$ ) were left untreated (NT) or were treated with Tat (100 nM) for 20 min. with or without pre-treatment for 10 min. with increasing concentrations of ibudilast or the p38 MAP kinase inhibitor, SB203580, as indicated. Whole cell lysates were subjected to immunoprecipitation with an immobilized phospho-p38 MAP kinase antibody. Precipitated p38 was incubated with an ATF-2 fusion protein substrate. Phosphorylated ATF-2 levels were determined by immunoblot analysis with a phospho-ATF-2-specific antibody (*top panel*). Whole cell lysate supernatants collected after immunoprecipitation were subjected to immunoblot analysis using p38-specific (*middle panel*) or  $\alpha$ -Tubulin-specific (*lower panel*) antibodies. Protein levels were quantified using ImageJ software (*bottom graph*). Phospho-ATF-2 levels were normalized to total p38 MAPK levels and fold change compared to NT was calculated. The results of a single representative experiment are shown; two total experiments were performed. doi:10.1371/journal.pone.0018633.g003

might be inhibiting TNF $\alpha$  production at the transcriptional level. We used quantitative real-time PCR (qRT-PCR) to determine whether ibudilast altered Tat-induced TNF $\alpha$  transcript levels in mouse microglial cells. Total RNA isolated from BV-2 cells treated with Tat with or without ibudilast pre-treatment was used to measure the abundance of TNF $\alpha$  transcripts. As compared to non-treated cells, there was an approximately 12-fold increase in TNF $\alpha$  mRNA levels in Tat-treated cells. Pre-treatment with vehicle control did not reduce the Tat-mediated increase in TNF $\alpha$  mRNA levels, however, pre-treatment with increasing concentrations of ibudilast dose-dependently inhibited Tat-induced TNF $\alpha$  mRNA levels (Figure 5).

### Inhibition of Tat-mediated TNF $\alpha$ transcription by ibudilast involves modulation of NF- $\kappa$ B

We, and others, have shown that NF- $\kappa$ B signaling plays an important role in Tat-induced TNF $\alpha$  production [54,69]. Indeed, activation of NF- $\kappa$ B is also affected by protein phosphatase activity [67,70]. To better understand how ibudilast inhibits Tat-induced TNF $\alpha$  transcription, we used a reporter gene assay. To do this, BV-2 cells were transiently transfected with a luciferase reporter plasmid in which the luciferase gene is placed under direct control of the NF- $\kappa$ B responsive element [71]. These cells were then treated with Tat either alone or together with vehicle control or ibudilast. Our results confirmed that pre-treatment with ibudilast inhibits activation of endogenous NF- $\kappa$ B induced by 8 h 100 nM Tat treatment (Figure 6A). A parallel transfection with a luciferase reporter plasmid in which the luciferase gene is downstream of OCT-1 transcription factor response elements was used as a control for the specificity of ibudilast's inhibition of NF- $\kappa$ B. We performed additional luciferase assays in which BV-2 cells were transfected with the NF- $\kappa$ B reporter together with either a plasmid expressing RelA, which is a major component of active NF- $\kappa$ B dimers, or an empty vector control plasmid. The total amount of DNA in each transfection was kept constant. Over-expression of RelA bypasses signaling defects by enriching functionally active homodimers in the nucleus due to a stoichiometric imbalance between over-expressed RelA and endogenous inhibitors such as p100 and inhibitor of kappa B- $\alpha$  (I $\kappa$ B $\alpha$ ). Interestingly, we did not see a reduction in luciferase expression induced by over-expression of RelA with ibudilast treatment (Figure 6B). Co-transfection with a *Renilla* luciferase reporter driven by the constitutively active HSV-1 TK promoter was used as an internal control for transfection efficiency. Similarly, BV-2 cells were transfected with the mouse TNF $\alpha$ -promoter luciferase reporter together with a plasmid expressing RelA. These cells were then treated with Tat either alone or together with vehicle control or ibudilast. Our results confirmed that over-expression of RelA was able to overcome ibudilast's inhibition of TNF $\alpha$  promoter activity (Figure 6C). As in Figure 6A, a parallel transfection with an OCT-1 luciferase reporter confirmed the specificity of ibudilast's inhibition of TNF $\alpha$  promoter activation. Together these results suggest that ibudilast inhibits the NF- $\kappa$ B signaling cascade, since this inhibition was overcome by RelA over-expression.

Inhibition of NF- $\kappa$ B can take place at multiple steps within the NF- $\kappa$ B signal transduction pathway. For example, the nuclear translocation of NF- $\kappa$ B proteins such as RelA could be blocked, or the transcriptional activity of these proteins in the nucleus could be inhibited. The I $\kappa$ B molecules interact with NF- $\kappa$ B dimers, leading to their retention in the cytoplasm in resting cells, as well as blocking the DNA binding activity of NF- $\kappa$ B [72]. Upon activation of the NF- $\kappa$ B pathway, I $\kappa$ B $\alpha$  is phosphorylated by the inhibitor of kappa B kinase (IKK) complex and subsequently targeted for ubiquitination and proteolytic degradation, thus freeing NF- $\kappa$ B dimers to move to the nucleus where they can activate transcription [73]. Indeed, high levels of I $\kappa$ B $\alpha$  were detected in whole cell lysates from untreated BV-2 cells, and as expected, incubation of these cells with Tat for 15 min. led to the rapid degradation of I $\kappa$ B $\alpha$  (Figure 6D). However, we did not see a reversal of this Tat-induced I $\kappa$ B $\alpha$  degradation by pre-treatment with increasing concentrations of ibudilast (Figure 6D). Additionally, pre-treatment with a proteasomal inhibitor, MG-132, did significantly reverse the Tat-induced I $\kappa$ B $\alpha$  degradation, as expected [74,75]. Under these conditions, no change was observed in  $\alpha$ -Tubulin protein levels (Figure 6D). Likewise, analogous to the results shown in Figure 6D, using immunofluorescence analysis, we observed nuclear translocation of RelA in 1 h 100 nM Tat-

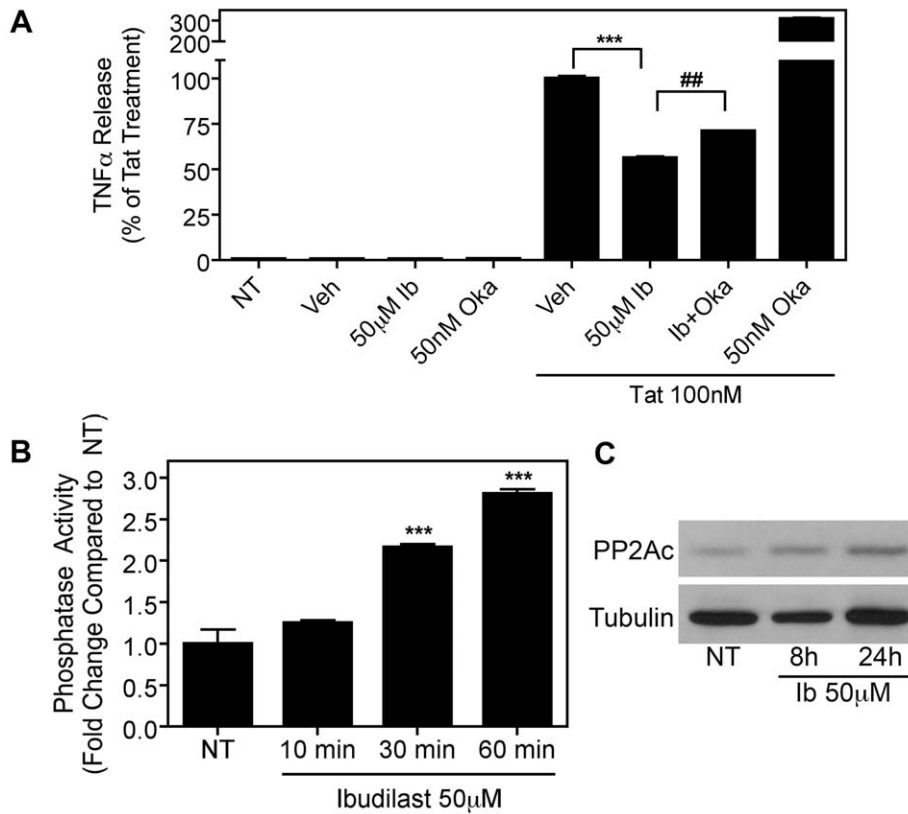

**Figure 4. Ibutilast inhibits Tat-induced TNF $\alpha$  production in a protein phosphatase dependent manner.** A, BV-2 cells ( $1.2 \times 10^5$ ) were left untreated (NT) or were treated with Tat (100 nM) for 8 h with or without pre-treatment for 30 min. with ibutilast (Ib, 50  $\mu$ M) or vehicle (Veh) alone or together with the protein phosphatase inhibitor, okadaic acid (Oka, 50 nM). TNF $\alpha$  release was measured by ELISA. The Tat+Veh-treated samples were set to 100% and all other samples were compared to this value (the TNF $\alpha$  concentration for this sample was 1861  $\mu$ g/mL). Results are shown as mean  $\pm$  SEM of values derived from three replicates from a single representative experiment; two total experiments were performed. Statistical significance is indicated, as compared to Tat+Veh-treated cells ( $p < 0.001$ , \*\*\*) or as compared to Tat+Ib-treated cells ( $p < 0.01$ , ##). B, Serine/Threonine phosphatase activity was measured in whole cell lysates from BV-2 cells ( $4.6 \times 10^5$ ) treated with ibutilast (50  $\mu$ M) for the indicated periods of time. Results are shown as mean  $\pm$  SEM of values derived from three replicates from a single representative experiment; two total experiments were performed. Statistical significance ( $p < 0.001$ ) is indicated, \*\*\*. C, BV-2 cells ( $1.2 \times 10^5$ ) were left untreated (NT) or were treated with ibutilast (50  $\mu$ M) for 8 h or 24 h, as indicated. Whole cell lysates were subjected to immunoblot analysis using either PP2Ac-specific (upper panel) or  $\alpha$ -Tubulin-specific (lower panel) antibodies. The results of a single representative experiment are shown; two total experiments were performed. doi:10.1371/journal.pone.0018633.g004

treated BV-2 cells. This RelA nuclear localization was not inhibited by pre-treatment with ibutilast (data not shown).

The transcriptional activity of RelA is partially controlled by post-translational modifications, including phosphorylation [76]. Through the activation of multiple signaling cascades, Tat and Tat-induced factors such as TNF $\alpha$ , are known to induce the phosphorylation of RelA at multiple sites [77,78,79]. Using antibodies that specifically recognize serine 276 and serine 536 phosphorylated RelA, we were able to confirm that RelA is indeed phosphorylated at both of these sites in Tat-treated BV-2 cells, but that ibutilast does not affect this Tat-induced phosphorylation of RelA (Figure 6E). Although the precise mechanism of ibutilast's action on NF- $\kappa$ B transcriptional activity remains unknown, we concluded that ibutilast may block NF- $\kappa$ B activity in a manner that is independent of nuclear translocation and phosphorylation of RelA.

## Discussion

We, and others, have previously demonstrated that TNF $\alpha$  produced from HIV-1 infected or activated macrophage and microglia in the CNS is a major player in HIV-1-induced

neuroinflammation, that eventually leads to neuron damage and cognitive impairment [54,80,81,82]. Both neuroinflammation and monocyte/macrophage infiltration into the CNS are critical factors in the development of HAND, despite effective control of HIV-1 levels with HAART. Antiretroviral drugs target and effectively control viral replication, but once proviral DNA has integrated into the host chromosome, the production of early viral proteins such as Tat, a known neurotoxin, is not affected by these antiretrovirals [83]. It is also important to consider the limited CNS penetration and neurotoxicities of many antiretroviral drugs themselves [84,85]. For these reasons, mechanisms to inhibit macrophage and microglial activation and neuroinflammation deserve further investigation in the pursuit of adjunctive therapies designed to protect CNS cells from damage caused by HIV-1. A myriad of possible adjunctive treatment compounds have been tested *in vitro*. Compounds targeting cellular signaling pathways including glycogen synthase kinase-3 beta (GSK3 $\beta$ ) and mixed lineage kinase-3 (MLK3), as well as compounds targeting pathological outcomes of HIV-1 infection in the CNS including excitotoxicity, oxidative stress, and inflammation showed initial promise *in vitro*, however, only a handful of these treatments have moved into clinical trials. To date, only memantine, an NMDAR



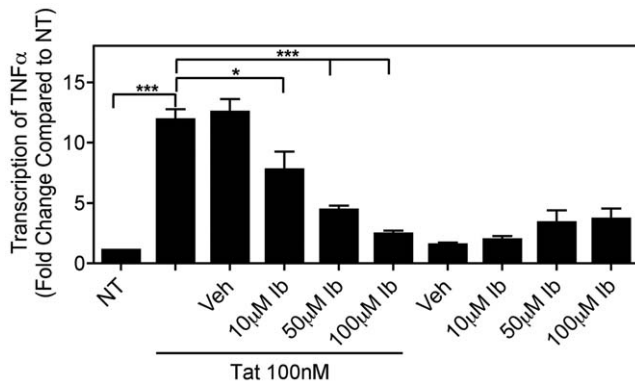

**Figure 5. Ibutilast inhibits Tat-induced TNF $\alpha$  transcript levels.** BV-2 cells ( $2.5 \times 10^5$ ) were left untreated (NT) or were treated with Tat (100 nM) for 4 h with or without pre-treatment for 30 min. with increasing concentrations of ibutilast (Ib) or vehicle (Veh). Total RNA was collected, reverse transcribed using oligo-dT primers, and subjected to Real-Time SYBR Green RT-PCR amplification. Fold induction of TNF $\alpha$  mRNA species was normalized to those of GAPDH and presented as a function of the expression level in NT samples. Data represent mean  $\pm$  SEM of values derived from three replicates from a single representative experiment. Statistical significance (\*\*\*,  $p < 0.001$  or \*,  $p < 0.05$ ) is denoted as compared to Tat-treated samples. doi:10.1371/journal.pone.0018633.g005

blocker, has preliminarily shown the ability to protect patients from HIV-1-induced neurocognitive damage [27]. The persistence of HAND despite effective HAART treatment, together with the lack of effective available adjunctive therapies for HAND, highlight the need for studies investigating novel adjunctive therapies.

In addition to ibutilast, other PDE inhibitors have been considered as anti-inflammatory agents in the context of HIV-1 infection. For example, initial *in vitro* experiments with pentoxifylline, a non-selective PDE inhibitor, showed that this drug inhibited microglial cell activation and the production of pro-inflammatory cytokines [86]. Also, in peripheral blood mononuclear cells (PBMCs) from HIV-1 positive, pentoxifylline-treated patients, there was lower LPS-induced TNF $\alpha$  release as compared to cells from HIV-1 positive, non-treated patients [36]. However, it was subsequently shown that the maximum tolerated dose of pentoxifylline in patients did not produce plasma concentrations high enough to match concentrations necessary to achieve the anti-inflammatory effects seen *in vitro* [87]. Additionally rolipram, a specific inhibitor of PDE 4, has been shown to suppress cytokine production and to inhibit HIV-1 replication in T-cells [35]. The low plasma concentrations of pentoxifylline, together with the gastrointestinal side effects associated with the use of PDE inhibitors, has limited further investigation of several PDE inhibitors for use in the context of HIV-1 infection.

NF- $\kappa$ B signaling plays an important role in the production of TNF $\alpha$ . As such, it has been shown that pentoxifylline inhibits NF- $\kappa$ B as a mechanism for its inhibition of TNF $\alpha$  [31,88,89,90]. Also, increased cAMP levels have been shown to inhibit NF- $\kappa$ B transcriptional activity [91]. Considering this, we chose to investigate the effect of ibutilast on NF- $\kappa$ B as a potential mechanism for its inhibition of TNF $\alpha$ . As predicted, we did see a significant inhibition of Tat-induced NF- $\kappa$ B activation by ibutilast. Interestingly, we did not see a reversal of Tat-mediated I $\kappa$ B $\alpha$  degradation with ibutilast pre-treatment. This lack of I $\kappa$ B $\alpha$  stabilization by ibutilast suggests that the NF- $\kappa$ B inhibition by ibutilast occurs after RelA nuclear translocation, which is mediated by I $\kappa$ B $\alpha$  degradation. The transcriptional activity of

RelA is partially controlled by multiple post-translational modifications, including phosphorylation, ubiquitination, and acetylation [76]. However, we did not see a reduction in Tat-induced RelA phosphorylation with ibutilast pre-treatment. Other possibilities for NF- $\kappa$ B inhibition in the nucleus include additional post-translational modifications, such as acetylation or ubiquitination, dimer exchange, or interactions with nuclear proteins such as the transcriptional coactivator and acetyltransferase, p300. Given the complexity of the regulation of NF- $\kappa$ B activity, it is not surprising that ibutilast's inhibition of NF- $\kappa$ B signaling appears to involve a post-translational modification of NF- $\kappa$ B, following normal mobilization of these molecules into the nucleus. Ibutilast could also potentially be inhibiting the DNA binding activity of NF- $\kappa$ B, as has been reported with the type 3 PDE inhibitor, cilostazol [52]. The precise mechanism of ibutilast's action on NF- $\kappa$ B transcriptional activity is currently under investigation in our laboratory.

In addition, there are hundreds of NF- $\kappa$ B inhibitors, all of which have greatly contributed to NF- $\kappa$ B research, but have limited clinical applications because of considerable toxicity to healthy cells, as NF- $\kappa$ B signaling is intricately involved in multiple cellular processes [92]. Considering the multiple functions of NF- $\kappa$ B signaling, specifically in the CNS [93], drugs such as ibutilast, with only partial inhibition of NF- $\kappa$ B in the context of HIV-1 in the CNS, could be beneficial.

Based on ibutilast's history of use in patients, this drug deserves further study as an anti-inflammatory agent in the context of HIV-1-induced neuroinflammation. Recent studies have shown that combinations of PDE inhibitors can synergistically suppress TNF $\alpha$  production by microglia at much lower concentrations than any single PDE inhibitor alone [32,42]. This could circumvent the problem of low patient plasma concentrations encountered with pentoxifylline treatment. It is also important to emphasize the tolerability of ibutilast in patients, as only mild gastrointestinal side effects, such as nausea and diarrhea, have been reported [28,29]. Indeed, ibutilast has been used for decades to treat bronchial asthma in Japan, and is being tested in clinical trials as a treatment for MS, opioid withdrawal, and neuropathic pain. Additionally, ibutilast has been shown to effectively cross the blood brain barrier and has been measured in rat brain tissue at concentrations close to plasma levels [30].

Considering ibutilast's potential ability to inhibit or resolve CNS inflammation, there could be additional benefits such as limiting viral spread by reducing the inflammation-induced influx of monocytes into the CNS. In addition, TNF $\alpha$  and other related cytokines have wide-ranging neuromodulatory and even neuroprotective functions [94]. As such, ibutilast's partial inhibition of Tat-induced TNF $\alpha$  production could be particularly useful when considering this drug as an adjunctive therapy for HAND. Complete inhibition of TNF $\alpha$  production is undesirable, as this could negatively impact TNF $\alpha$ 's ability to perform efficient host defense. In this respect, it has been shown that TNF $\alpha$  blockade can cause reactivation of tuberculosis (TB) in animal models [95], and it has also been suggested that inhibition of TNF $\alpha$  in patients with chronic hepatitis B infection (HBV) could worsen the disease, since TNF $\alpha$  is involved in viral clearance [95]. Furthermore, inhibition of TNF $\alpha$  in the context of other neuroinflammatory disorders such as MS and Alzheimer's disease (AD) has very recently been shown to be associated with progressive multifocal leukoencephalopathy (PML) and demyelination [96]. Taken together, these considerations again emphasize that ibutilast's partial inhibition of TNF $\alpha$  could be beneficial, rather than detrimental. In summary, our findings shed light on the mechanism of ibutilast's inhibition of Tat-induced TNF $\alpha$  production in microglial cells and may

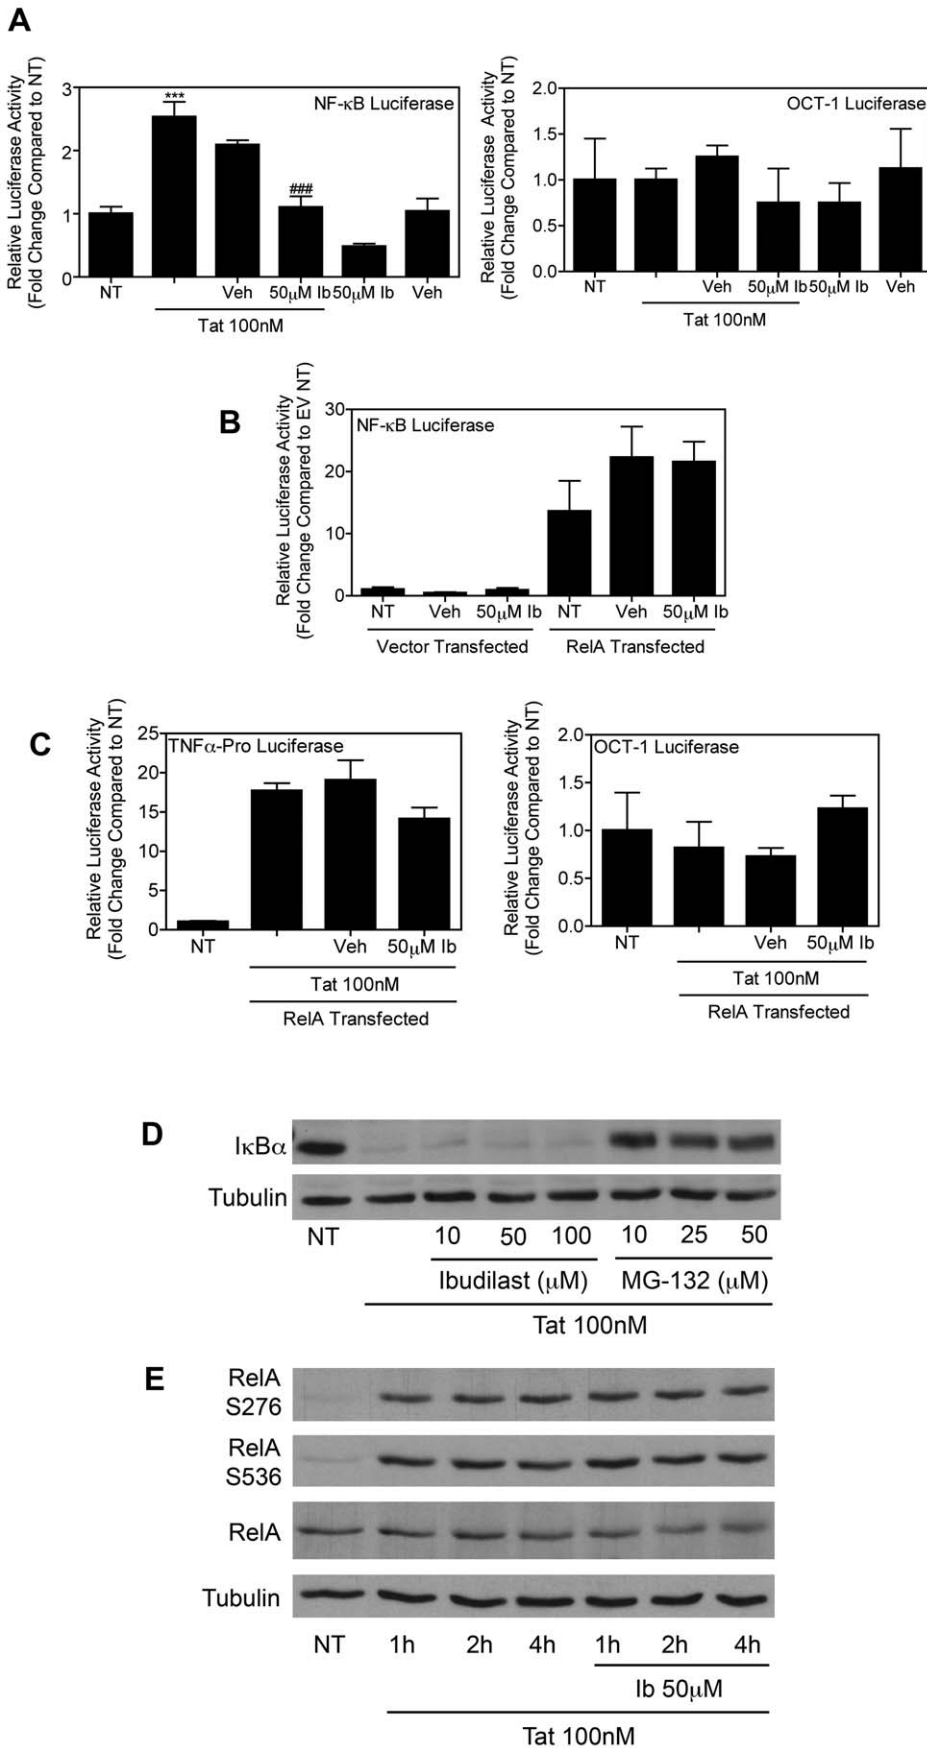

**Figure 6. Ibudilast inhibits Tat-induced TNF $\alpha$  production via modulation of NF- $\kappa$ B signaling.** A, BV-2 cells ( $10 \times 10^6$ ) were transiently transfected using Nucleofector (Amaxa/Lonza) with an NF- $\kappa$ B-dependent luciferase reporter plasmid. 16 h post-transfection, cells were left untreated or were treated with Tat (100 nM) for 8 h with or without pre-treatment for 30 min. with 50  $\mu$ M ibudilast (Ib) or vehicle (Veh). Luciferase activity in whole cell lysates was determined. Results are shown as mean  $\pm$  SEM of values derived from three replicates from a single representative experiment; two total experiments were performed. Statistical significance is denoted (\*\*\*,  $p < 0.001$ ) as compared to NT samples or (###,  $p < 0.001$ ) as compared to Tat-treated samples. A parallel transfection with a luciferase reporter containing responsive elements of the OCT-1 transcription factor upstream of a firefly luciferase gene was included as a control for the specificity of ibudilast's inhibition of NF- $\kappa$ B transcriptional activity. B, BV-2 cells ( $10 \times 10^6$ ) were transiently transfected using Nucleofector (Amaxa/Lonza) with an NF- $\kappa$ B-dependent luciferase reporter plasmid alone or together with either a RelA-encoding plasmid or a vector control plasmid. 16 h post-transfection, cells were left untreated or were treated with 50  $\mu$ M ibudilast (Ib) or vehicle (Veh) for 8 h. Luciferase activity in whole cell lysates was determined. Results are shown as mean  $\pm$  SEM of values derived from three replicates from a single representative experiment; two total experiments were performed. Co-transfection with a *Renilla* luciferase reporter plasmid was included as a control for transfection efficiency. For each sample the firefly luciferase reading was divided by the *Renilla* luciferase reading. C, BV-2 cells ( $10 \times 10^6$ ) were transiently transfected using Nucleofector (Amaxa/Lonza) with a plasmid containing a luciferase reporter gene under transcriptional control of the mouse TNF $\alpha$  promoter region, alone or together with a RelA-encoding plasmid. 16 h post-transfection, cells were left untreated or were treated with Tat (100 nM) for 8 h with or without pre-treatment for 30 min. with 50  $\mu$ M ibudilast (Ib) or vehicle (Veh). Luciferase activity in whole cell lysates was determined. Results are shown as mean  $\pm$  SEM of values derived from three replicates from a single representative experiment; two total experiments were performed. A parallel transfection with the OCT-1 luciferase reporter was included as a control for the specificity of ibudilast's inhibition of TNF $\alpha$  promoter activation. D, BV-2 cells ( $1.2 \times 10^5$ ) were left untreated (NT) or were treated with Tat (100 nM) for 15 min. with or without pre-treatment for 30 min. with increasing concentrations of ibudilast or MG-132, as indicated. Whole cell lysates were subjected to immunoblot analysis using either I $\kappa$ B $\alpha$ -specific (upper panel) or  $\alpha$ -Tubulin-specific (lower panel) antibodies. The results of a single representative experiment are shown; three total experiments were performed. E, BV-2 cells ( $1.2 \times 10^5$ ) were left untreated (NT) or were treated with Tat (100 nM) for the indicated periods of time with or without pre-treatment for 30 min. with increasing concentrations of ibudilast, as indicated. Whole cell lysates were subjected to immunoblot analysis using RelA phospho-serine 276-specific (first panel), RelA phospho-serine 536-specific (second panel), total RelA-specific (third panel), or  $\alpha$ -Tubulin-specific (fourth panel) antibodies. The results of a single representative experiment are shown; two total experiments were performed.

doi:10.1371/journal.pone.0018633.g006

implicate ibudilast as a potential adjunctive therapy for the management of HAND.

## Acknowledgments

We thank Drs. S. C. Sun, R. Donato, D. Kuprash and G. Schifitto for generously providing us with valuable reagents.

## References

- Resnick L, Berger JR, Shapshak P, Tourtellotte WW (1988) Early penetration of the blood-brain-barrier by HIV. *Neurology* 38: 9–14.
- Kaul M, Lipton SA (2006) Mechanisms of neuronal injury and death in HIV-1 associated dementia. *Curr HIV Res* 4: 307–318.
- Nath A, Sacktor N (2006) Influence of highly active antiretroviral therapy on persistence of HIV in the central nervous system. *Curr Opin Neurol* 19: 358–361.
- Tozzi V, Balestra P, Bellagamba R, Corpolongo A, Salvatori MF, et al. (2007) Persistence of neuropsychologic deficits despite long-term highly active antiretroviral therapy in patients with HIV-related neurocognitive impairment: prevalence and risk factors. *J Acquir Immune Defic Syndr* 45: 174–182.
- McArthur JC (2004) HIV dementia: an evolving disease. *J Neuroimmunol* 157: 3–10.
- Archibald SL, Masliah E, Fennema-Notestine C, Marcotte TD, Ellis RJ, et al. (2004) Correlation of in vivo neuroimaging abnormalities with postmortem human immunodeficiency virus encephalitis and dendritic loss. *Arch Neurol* 61: 369–376.
- Bissel SJ, Wang G, Ghosh M, Reinhart TA, Capuano S, 3rd, et al. (2002) Macrophages relate presynaptic and postsynaptic damage in simian immunodeficiency virus encephalitis. *Am J Pathol* 160: 927–941.
- Everall IP, Heaton RK, Marcotte TD, Ellis RJ, McCutchan JA, et al. (1999) Cortical synaptic density is reduced in mild to moderate human immunodeficiency virus neurocognitive disorder. HNRG Group. *HIV Neurobehavioral Research Center. Brain Pathol* 9: 209–217.
- Masliah E, Heaton RK, Marcotte TD, Ellis RJ, Wiley CA, et al. (1997) Dendritic injury is a pathological substrate for human immunodeficiency virus-related cognitive disorders. HNRG Group. *The HIV Neurobehavioral Research Center. Ann Neurol* 42: 963–972.
- Major EO (2009) Progressive Multifocal Leukoencephalopathy in Patients on Immunomodulatory Therapies. *Annu Rev Med*.
- Cardenas V, Meyerhoff D, Studholme C, Kornak J, Rothlind J, et al. (2009) Evidence for ongoing brain injury in human immunodeficiency virus-positive patients treated with antiretroviral therapy. *J Neurovirol*. pp 1–10.
- Chen Y, An H, Zhu H, Stone T, Smith JK, et al. (2009) White matter abnormalities revealed by diffusion tensor imaging in non-demented and demented HIV+ patients. *Neuroimage* 47: 1154–1162.
- Gongvatana A, Schweinsburg BC, Taylor MJ, Theilmann RJ, Letendre SL, et al. (2009) White matter tract injury and cognitive impairment in human immunodeficiency virus-infected individuals. *J Neurovirol* 15: 187–195.
- Langford TD, Letendre SL, Marcotte TD, Ellis RJ, McCutchan JA, et al. (2002) Severe, demyelinating leukoencephalopathy in AIDS patients on antiretroviral therapy. *AIDS* 16: 1019–1029.
- Langford TD, Letendre SL, Larrea GJ, Masliah E (2003) Changing patterns in the neuropathogenesis of HIV during the HAART era. *Brain Pathol* 13: 195–210.
- Avison MJ, Nath A, Greene-Avison R, Schmitt FA, Bales RA, et al. (2004) Inflammatory changes and breakdown of microvascular integrity in early human immunodeficiency virus dementia. *J Neurovirol* 10: 223–232.
- Glass JD, Fedor H, Wesselingh SL, McArthur JC (1995) Immunocytochemical quantitation of human immunodeficiency virus in the brain: correlations with dementia. *Ann Neurol* 38: 755–762.
- Everall IP, Glass JD, McArthur J, Spargo E, Lantos P (1994) Neuronal density in the superior frontal and temporal gyri does not correlate with the degree of human immunodeficiency virus-associated dementia. *Acta Neuropathol* 88: 538–544.
- Rumbaugh JA, Nath A (2006) Developments in HIV neuropathogenesis. *Curr Pharm Des* 12: 1023–1044.
- Westendorp MO, Frank R, Ochsenbauer C, Stricker K, Dhein J, et al. (1995) Sensitization of T cells to CD95-mediated apoptosis by HIV-1 Tat and gp120. *Nature* 375: 497–500.
- Xiao H, Neuvet C, Tiffany HL, Benkirane M, Rich EA, et al. (2000) Selective CXCR4 antagonism by Tat: implications for in vivo expansion of coreceptor use by HIV-1. *Proc Natl Acad Sci U S A* 97: 11466–11471.
- Hayashi K, Pu H, Andras IE, Eum SY, Yamauchi A, et al. (2006) HIV-TAT protein upregulates expression of multidrug resistance protein 1 in the blood-brain barrier. *J Cereb Blood Flow Metab* 26: 1052–1065.
- D'Aversa TG, Yu KO, Berman JW (2004) Expression of chemokines by human fetal microglia after treatment with the human immunodeficiency virus type 1 protein Tat. *J Neurovirol* 10: 86–97.
- Eugenin EA, Dyer G, Calderon TM, Berman JW (2005) HIV-1 tat protein induces a migratory phenotype in human fetal microglia by a CCL2 (MCP-1)-dependent mechanism: possible role in NeuroAIDS. *Glia* 49: 501–510.
- Schifitto G, Zhang J, Evans SR, Sacktor N, Simpson D, et al. (2007) A multicenter trial of selegiline transdermal system for HIV-associated cognitive impairment. *Neurology* 69: 1314–1321.
- Schifitto G, Yiannoutsos CT, Ernst T, Navia BA, Nath A, et al. (2009) Selegiline and oxidative stress in HIV-associated cognitive impairment. *Neurology* 73: 1975–1981.

## Author Contributions

Conceived and designed the experiments: MK SBM. Performed the experiments: MK. Analyzed the data: MK SBM. Contributed reagents/materials/analysis tools: MK SBM. Wrote the paper: MK SBM.

27. Schifitto G, Navia BA, Yiannoutsos CT, Marra CM, Chang L, et al. (2007) Memantine and HIV-associated cognitive impairment: a neuropsychological and proton magnetic resonance spectroscopy study. *Aids* 21: 1877–1886.
28. Rolan P, Hutchinson M, Johnson K (2009) Ibutilast: a review of its pharmacology, efficacy and safety in respiratory and neurological disease. *Expert Opin Pharmacother* 10: 2897–2904.
29. Ledebner A, Hutchinson MR, Watkins LR, Johnson KW (2007) Ibutilast (AV-411). A new class therapeutic candidate for neuropathic pain and opioid withdrawal syndromes. *Expert Opin Investig Drugs* 16: 935–950.
30. Ledebner A, Liu T, Shumilla JA, Mahoney JH, Vijay S, et al. (2006) The glial modulatory drug AV411 attenuates mechanical allodynia in rat models of neuropathic pain. *Neuron Glia Biol* 2: 279–291.
31. Derec J, Martins JO, Melbostad H, Loomis WH, Coimbra R (2008) Insights into the regulation of TNF- $\alpha$  production in human mononuclear cells: the effects of non-specific phosphodiesterase inhibition. *Clinics (Sao Paulo)* 63: 321–328.
32. Suzumura A, Ito A, Yoshikawa M, Sawada M (1999) Ibutilast suppresses TNF $\alpha$  production by glial cells functioning mainly as type III phosphodiesterase inhibitor in the CNS. *Brain Res* 837: 203–212.
33. Barkhof F, Hulst HE, Drulovic J, Uitdehaag BM, Matsuda K, et al. (2010) Ibutilast in relapsing-remitting multiple sclerosis: a neuroprotectant? *Neurology* 74: 1033–1040.
34. Beardsley PM, Shelton KL, Hendrick E, Johnson KW (2010) The glial cell modulator and phosphodiesterase inhibitor, AV411 (ibutilast), attenuates prime- and stress-induced methamphetamine relapse. *Eur J Pharmacol* 637: 102–108.
35. Navarro J, Punzon C, Jimenez JL, Fernandez-Cruz E, Pizarro A, et al. (1998) Inhibition of phosphodiesterase type IV suppresses human immunodeficiency virus type 1 replication and cytokine production in primary T cells: involvement of NF- $\kappa$ B and NFAT. *J Virol* 72: 4712–4720.
36. Dezube BJ, Lederman MM, Spritzler JG, Chapman B, Korvick JA, et al. (1995) High-dose zidovudine in patients with AIDS: inhibition of tumor necrosis factor production. National Institute of Allergy and Infectious Diseases AIDS Clinical Trials Group. *J Infect Dis* 171: 1628–1632.
37. Angel JB, Saget BM, Walsh SP, Greten TF, Dinarello CA, et al. (1995) Rolipram, a specific type IV phosphodiesterase inhibitor, is a potent inhibitor of HIV-1 replication. *Aids* 9: 1137–1144.
38. Chang HC, Samaniego F, Nair BC, Buonaguro L, Ensoli B (1997) HIV-1 Tat protein exits from cells via a leaderless secretory pathway and binds to extracellular matrix-associated heparan sulfate proteoglycans through its basic region. *Aids* 11: 1421–1431.
39. Nath A, Haughey NJ, Jones M, Anderson C, Bell JE, et al. (2000) Synergistic neurotoxicity by human immunodeficiency virus proteins Tat and gp120: protection by memantine. *Ann Neurol* 47: 186–194.
40. Nichol KE, Poon WW, Parachikova AI, Cribbs DH, Glabe CG, et al. (2008) Exercise alters the immune profile in Tg2576 Alzheimer mice toward a response coincident with improved cognitive performance and decreased amyloid. *J Neuroinflammation* 5: 13.
41. de Jager W, te Velthuis H, Prakken BJ, Kuis W, Rijkers GT (2003) Simultaneous detection of 15 human cytokines in a single sample of stimulated peripheral blood mononuclear cells. *Clin Diagn Lab Immunol* 10: 133–139.
42. Yoshikawa M, Suzumura A, Tamaru T, Takayanagi T, Sawada M (1999) Effects of phosphodiesterase inhibitors on cytokine production by microglia. *Mult Scler* 5: 126–133.
43. Frankel AD, Pabo CO (1988) Cellular uptake of the tat protein from human immunodeficiency virus. *Cell* 55: 1189–1193.
44. Gonzalez-Scarano F, Martin-Garcia J (2005) The neuropathogenesis of AIDS. *Nat Rev Immunol* 5: 69–81.
45. Saha RN, Pahan K (2003) Tumor necrosis factor- $\alpha$  at the crossroads of neuronal life and death during HIV-associated dementia. *J Neurochem* 86: 1057–1071.
46. Mengozzi M, De Filippi C, Transidico P, Biswas P, Cota M, et al. (1999) Human immunodeficiency virus replication induces monocyte chemoattractant protein-1 in human macrophages and U937 promonocytic cells. *Blood* 93: 1851–1857.
47. Zen K, Masuda J, Sasaguri T, Kosaka C, Ogata J (1994) Gene expression of monocyte chemoattractant protein-1 in human monocytes is regulated by cell density through protein tyrosine kinase and protein kinase C. *Exp Cell Res* 215: 172–179.
48. Turchan-Cholewo J, Dimayuga FO, Gupta S, Keller JN, Knapp PE, et al. (2009) Morphine and HIV-Tat increase microglial-free radical production and oxidative stress: possible role in cytokine regulation. *J Neurochem* 108: 202–215.
49. Turchan-Cholewo J, Dimayuga VM, Gupta S, Gorospe RM, Keller JN, et al. (2009) NADPH oxidase drives cytokine and neurotoxin release from microglia and macrophages in response to HIV-Tat. *Antioxid Redox Signal* 11: 193–204.
50. Henn A, Lund S, Hedtjarn M, Schratzenholz A, Porzgen P, et al. (2009) The suitability of BV2 cells as alternative model system for primary microglia cultures or for animal experiments examining brain inflammation. *ALTEX* 26: 83–94.
51. Oh YT, Lee JY, Lee J, Lee JH, Kim JE, et al. (2010) Oleamide suppresses lipopolysaccharide-induced expression of iNOS and COX-2 through inhibition of NF- $\kappa$ B activation in BV2 murine microglial cells. *Neurosci Lett* 474: 148–153.
52. Jung WK, Lee DY, Park C, Choi YH, Choi I, et al. (2010) Cilostazol is anti-inflammatory in BV2 microglial cells by inactivating nuclear factor- $\kappa$ B and inhibiting mitogen-activated protein kinases. *Br J Pharmacol* 159: 1274–1285.
53. Bokhari SM, Yao H, Bethel-Brown C, Fuwang P, Williams R, et al. (2009) Morphine enhances Tat-induced activation in murine microglia. *J Neurovirol* 15: 219–228.
54. Sui Z, Sniderhan LF, Schifitto G, Phipps RP, Gelbard HA, et al. (2007) Functional synergy between CD40 ligand and HIV-1 Tat contributes to inflammation: implications in HIV type 1 dementia. *J Immunol* 178: 3226–3236.
55. Kreth S, Ledderose C, Luchting B, Weis F, Thiel M (2010) Immunomodulatory properties of pentoxifylline are mediated via adenosine-dependent pathways. *Shock* 34: 10–16.
56. Yasui K, Agematsu K, Shinozaki K, Hokibara S, Nagumo H, et al. (2000) Theophylline induces neutrophil apoptosis through adenosine A2A receptor antagonism. *J Leukoc Biol* 67: 529–535.
57. Yasui K, Kondo Y, Wada T, Yashiro M, Tsuge M, et al. (2009) Theophylline inhibits the differentiation of human monocyte into dendritic cell potentially via adenosine receptor antagonism. *Clin Exp Allergy* 39: 1857–1865.
58. Hasko G, Kuhel DG, Chen JF, Schwarzschild MA, Deitch EA, et al. (2000) Adenosine inhibits IL-12 and TNF- $\alpha$  production via adenosine A2a receptor-dependent and independent mechanisms. *FASEB J* 14: 2065–2074.
59. Mayne M, Fotheringham J, Yan HJ, Power C, Del Bigio MR, et al. (2001) Adenosine A2A receptor activation reduces proinflammatory events and decreases cell death following intracerebral hemorrhage. *Ann Neurol* 49: 727–735.
60. McWhinney CD, Dudley MW, Bowlin TL, Peet NP, Schook L, et al. (1996) Activation of adenosine A3 receptors on macrophages inhibits tumor necrosis factor- $\alpha$ . *Eur J Pharmacol* 310: 209–216.
61. Fotheringham J, Mayne M, Holden C, Nath A, Geiger JD (2004) Adenosine receptors control HIV-1 Tat-induced inflammatory responses through protein phosphatase. *Virology* 327: 186–195.
62. Zarubin T, Han J (2005) Activation and signaling of the p38 MAP kinase pathway. *Cell Res* 15: 11–18.
63. Costantini TW, Derec J, Martins JO, Loomis WH, Bansal V, et al. (2010) Pentoxifylline attenuates leukoreduced stored blood-induced neutrophil activation through inhibition of mitogen-activated protein kinases. *Immunopharmacol Immunotoxicol* 32: 74–81.
64. Moon EY, Lerner A (2003) PDE4 inhibitors activate a mitochondrial apoptotic pathway in chronic lymphocytic leukemia cells that is regulated by protein phosphatase 2A. *Blood* 101: 4122–4130.
65. Sandoval J, Escobar J, Pereda J, Sacilotto N, Rodriguez JL, et al. (2009) Pentoxifylline prevents loss of PP2A phosphatase activity and recruitment of histone acetyltransferases to proinflammatory genes in acute pancreatitis. *J Pharmacol Exp Ther* 331: 609–617.
66. Cyert MS (2001) Regulation of nuclear localization during signaling. *J Biol Chem* 276: 20805–20808.
67. Israel A (1995) A role for phosphorylation and degradation in the control of NF- $\kappa$ B activity. *Trends Genet* 11: 203–205.
68. Sun W, Wang H, Zhao X, Yu Y, Fan Y, et al. (2010) Protein phosphatase 2A acts as a mitogen-activated protein kinase kinase 3 (MEKK3) phosphatase to inhibit lysophosphatidic acid-induced I $\kappa$ B kinase beta/nuclear factor- $\kappa$ B activation. *J Biol Chem* 285: 21341–21348.
69. Nath A, Conant K, Chen P, Scott C, Major EO (1999) Transient exposure to HIV-1 Tat protein results in cytokine production in macrophages and astrocytes. A hit and run phenomenon. *J Biol Chem* 274: 17098–17102.
70. Sun SC, Maggirwar SB, Harhaj E (1995) Activation of NF- $\kappa$ B by phosphatase inhibitors involves the phosphorylation of I $\kappa$ B alpha at phosphatase 2A-sensitive sites. *J Biol Chem* 270: 18347–18351.
71. Sui Z, Sniderhan LF, Fan S, Kazmierczak K, Reisinger E, et al. (2006) Human immunodeficiency virus-encoded Tat activates glycogen synthase kinase-3 $\beta$  to antagonize nuclear factor- $\kappa$ B survival pathway in neurons. *Eur J Neurosci* 23: 2623–2634.
72. Ghosh S, Karin M (2002) Missing pieces in the NF- $\kappa$ B puzzle. *Cell* 109 Suppl: S81–96.
73. Karin M, Ben-Neriah Y (2000) Phosphorylation meets ubiquitination: the control of NF- $\kappa$ B activity. *Annu Rev Immunol* 18: 621–663.
74. Kovacs AD, Chakraborty-Sett S, Ramirez SH, Sniderhan LF, Williamson AL, et al. (2004) Mechanism of NF- $\kappa$ B inactivation induced by survival signal withdrawal in cerebellar granule neurons. *Eur J Neurosci* 20: 345–352.
75. Fine SM, Maggirwar SB, Elliott PR, Epstein LG, Gelbard HA, et al. (1999) Proteasome blockers inhibit TNF- $\alpha$  release by lipopolysaccharide stimulated macrophages and microglia: implications for HIV-1 dementia. *J Neuroimmunol* 95: 55–64.
76. Huang B, Yang XD, Lamb A, Chen LF (2010) Posttranslational modifications of NF- $\kappa$ B: another layer of regulation for NF- $\kappa$ B signaling pathway. *Cell Signal* 22: 1282–1290.
77. Leghmar K, Bennis Y, Bahraoui E (2008) HIV-1 Tat protein induces IL-10 production in monocytes by classical and alternative NF- $\kappa$ B pathways. *Eur J Cell Biol* 87: 947–962.
78. Kiebal M, Poleskaya O, Yao Z, Perry SW, Maggirwar SB (2010) Nuclear Factor-Kappa B Family Member RelB Inhibits Human Immunodeficiency Virus-1 Tat-Induced Tumor Necrosis Factor-Alpha Production. *PLoS One* 5: e11875.
79. Vermeulen L, De Wilde G, Van Damme P, Vanden Berghe W, Haegeman G (2003) Transcriptional activation of the NF- $\kappa$ B p65 subunit by mitogen- and stress-activated protein kinase-1 (MSK1). *Embo J* 22: 1313–1324.

80. Fine SM, Angel RA, Perry SW, Epstein LG, Rothstein JD, et al. (1996) Tumor necrosis factor alpha inhibits glutamate uptake by primary human astrocytes. Implications for pathogenesis of HIV-1 dementia. *J Biol Chem* 271: 15303–15306.
81. Gelbard HA, Dzenko KA, DiLoreto D, del Cerro C, del Cerro M, et al. (1993) Neurotoxic effects of tumor necrosis factor alpha in primary human neuronal cultures are mediated by activation of the glutamate AMPA receptor subtype: implications for AIDS neuropathogenesis. *Dev Neurosci* 15: 417–422.
82. Brabers NA, Nottet HS (2006) Role of the pro-inflammatory cytokines TNF-alpha and IL-1beta in HIV-associated dementia. *Eur J Clin Invest* 36: 447–458.
83. Rumbaugh JA, Steiner J, Sacktor N, Nath A (2008) Developing neuroprotective strategies for treatment of HIV-associated neurocognitive dysfunction. *Futur HIV Ther* 2: 271–280.
84. Cherry CL, McArthur JC, Hoy JF, Wesselingh SL (2003) Nucleoside analogues and neuropathy in the era of HAART. *J Clin Virol* 26: 195–207.
85. Vidal F, Gutierrez F, Gutierrez M, Olona M, Sanchez V, et al. (2010) Pharmacogenetics of adverse effects due to antiretroviral drugs. *AIDS Rev* 12: 15–30.
86. Neuner P, Klosner G, Schauer E, Pourmojib M, Macheiner W, et al. (1994) Pentoxifylline in vivo down-regulates the release of IL-1 beta, IL-6, IL-8 and tumour necrosis factor-alpha by human peripheral blood mononuclear cells. *Immunology* 83: 262–267.
87. Hejilgenberg R, Romijn JA, Ackermans M, Enderit E, Timmer JG, et al. (1998) The maximal tolerable intravenous dosage of pentoxifylline in AIDS patients does not inhibit lipopolysaccharide-stimulated tumor necrosis factor alpha production. *AIDS Res Hum Retroviruses* 14: 299–303.
88. Coimbra R, Melbostad H, Loomis W, Tobar M, Hoyt DB (2005) Phosphodiesterase inhibition decreases nuclear factor-kappaB activation and shifts the cytokine response toward anti-inflammatory activity in acute endotoxemia. *J Trauma* 59: 575–582.
89. Coimbra R, Melbostad H, Loomis W, Porcides RD, Wolf P, et al. (2006) LPS-induced acute lung injury is attenuated by phosphodiesterase inhibition: effects on proinflammatory mediators, metalloproteinases, NF-kappaB, and ICAM-1 expression. *J Trauma* 60: 115–125.
90. Ji Q, Zhang L, Lv R, Jia H, Xu J (2006) Pentoxifylline decreases up-regulated nuclear factor kappa B activation and cytokine production in the rat retina following transient ischemia. *Ophthalmologica* 220: 217–224.
91. Ollivier V, Parry GC, Cobb RR, de Prost D, Mackman N (1996) Elevated cyclic AMP inhibits NF-kappaB-mediated transcription in human monocytic cells and endothelial cells. *J Biol Chem* 271: 20828–20835.
92. Gilmore TD, Herscovitch M (2006) Inhibitors of NF-kappaB signaling: 785 and counting. *Oncogene* 25: 6887–6899.
93. Meffert MK, Baltimore D (2005) Physiological functions for brain NF-kappaB. *Trends Neurosci* 28: 37–43.
94. Perry SW, Dewhurst S, Bellizzi MJ, Gelbard HA (2002) Tumor necrosis factor-alpha in normal and diseased brain: Conflicting effects via intraneuronal receptor crosstalk? *J Neurovirol* 8: 611–624.
95. Wong M, Ziring D, Korin Y, Desai S, Kim S, et al. (2008) TNFalpha blockade in human diseases: mechanisms and future directions. *Clin Immunol* 126: 121–136.
96. Lysandropoulos AP, Du Pasquier RA (2010) Demyelination as a complication of new immunomodulatory treatments. *Curr Opin Neurol* 23: 226–233.
